# Supplementary figures and images for: Feedbacks between the formation of secondary minerals and the infiltration of fluids into the regolith of granitic rocks in different climatic zones (Chilean Coastal Cordillera)
Source: Copernicus journal article supplement (doi:10.5194/esurf-2022-71), 2023-01-17

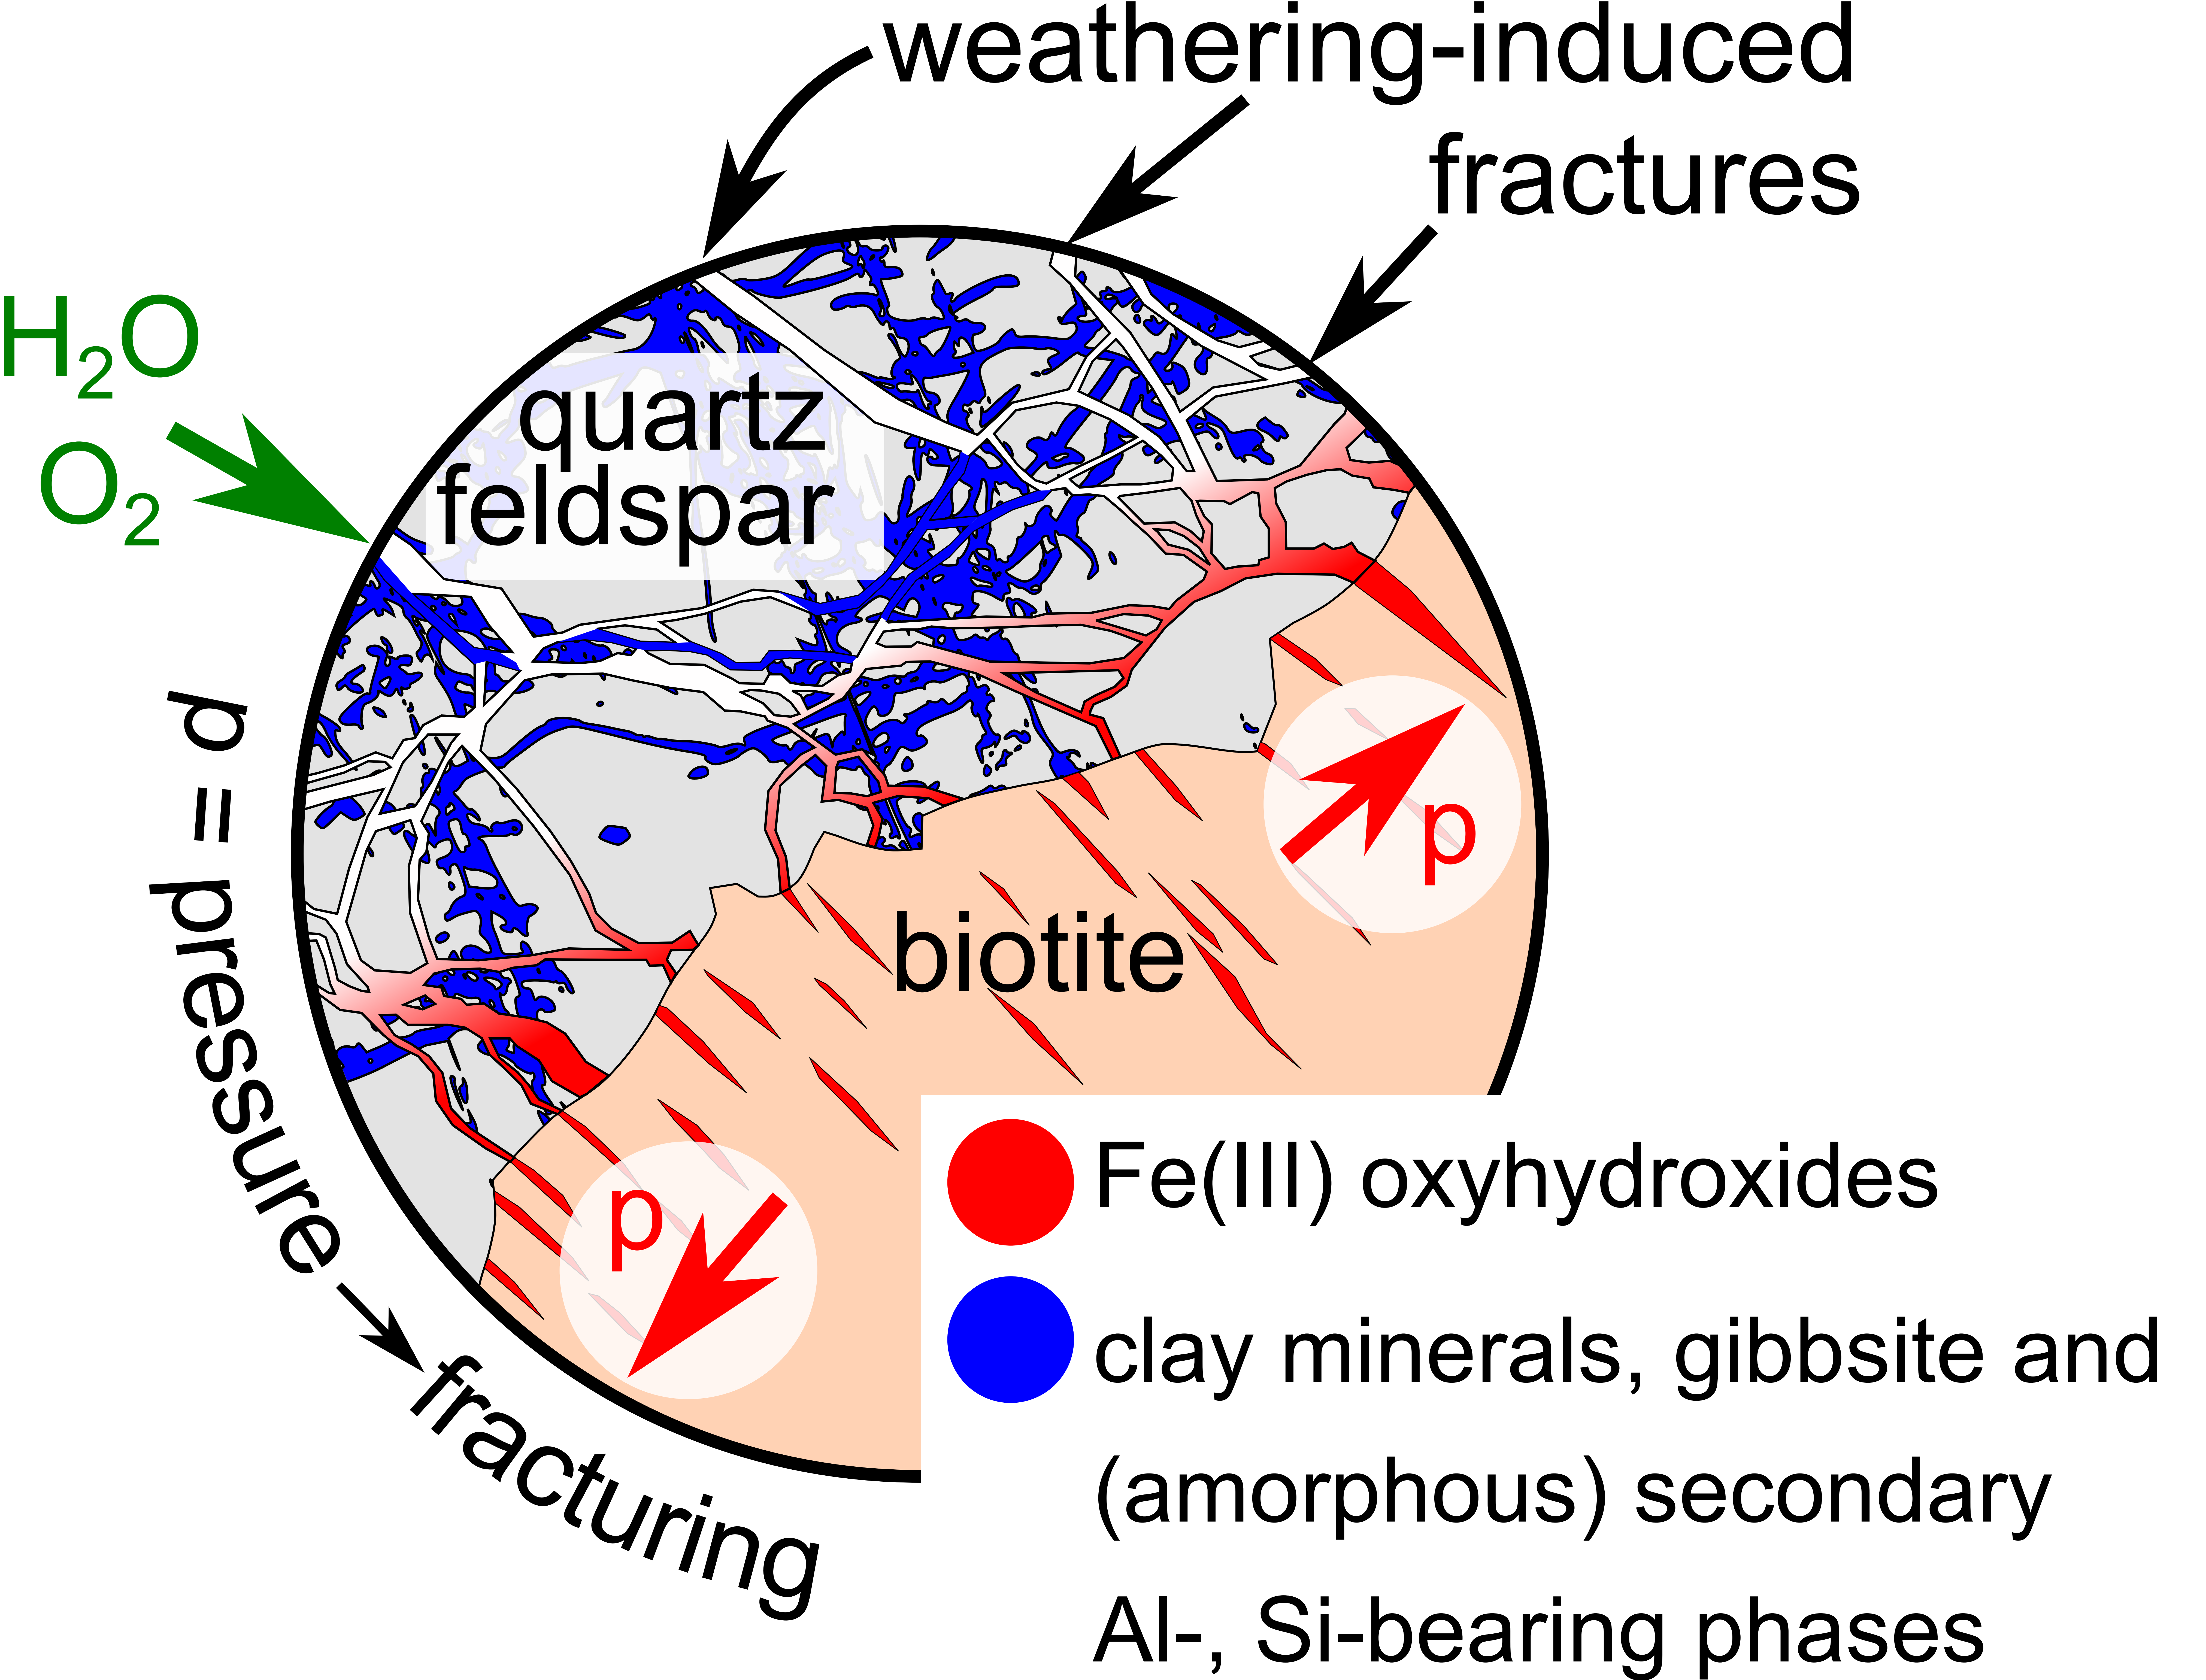

Supplement: Supplementary file 1 [file esurf-2022-71-supplement.pdf]
